# Supplementary material for: SiOx-based graphite composite anode and efficient binders: practical applications in lithium-ion batteries
Source: Royal Society of Chemistry journal article supplement (doi:10.1039/d0ra10283k), 2021-01-01
Supplement: d0ra10283k1.pdf [file d0ra10283k1.pdf]

## **SiO<sub>x</sub>-based Graphite Composite Anode and efficient binders: Practical Applications in Lithium-ion Batteries**

5 Yonglian Xiong,<sup>\*</sup> Houchao Xing, Yongsheng Fan, Ying Wei, Jin Shang, Yuwei Chen, Jun Yan  
College of Automotive Engineering, Yancheng Institute of Technology, Yancheng Jiangsu 224051, China,  
<sup>\*</sup>Corresponding author Email: serena77@126.com.

10

15

20

25

30

35

40

45

## Tables

**Table S1** The swelling of 423480 pouch cells using PAA and SBR binder ( $\Delta S$ : Increasing swelling)

| Cycles         | $T_0$<br>(mm) | 50 <sup>th</sup> | 100 <sup>th</sup> | 150 <sup>th</sup> | 200 <sup>th</sup> | 250 <sup>th</sup> | 300 <sup>th</sup> | 350 <sup>th</sup> | 400 <sup>th</sup> | 450 <sup>th</sup> |
|----------------|---------------|------------------|-------------------|-------------------|-------------------|-------------------|-------------------|-------------------|-------------------|-------------------|
| $\Delta S$ (%) |               |                  |                   |                   |                   |                   |                   |                   |                   |                   |
| PPA-1          | 4.06          | 2.20             | 2.44              | 3.18              | 4.38              | 5.62              | 6.11              | 7.33              | 7.36              | 7.49              |
| PPA-2          | 4.09          | 2.86             | 2.96              | 3.69              | 4.16              | 5.40              | 6.50              | 7.68              | 7.77              |                   |
| SBR-1          | 4.1           | 1.71             | 1.95              | 3.41              | 4.88              | 5.90              | 6.59              | 7.92              | 8.54              |                   |
| SBR-2          | 4.09          | 2.20             | 2.69              | 3.67              | 5.13              | 5.72              | 6.62              | 8.06              | 8.49              | 9.56              |

**Table S2** IR and anode electrode thickness change of 423480 pouch cells (before and after cycling)

| cell  | IR(m $\Omega$ ) |                          | $\Delta IR$ (%)(after 400 <sup>th</sup> ) | Anode electrode thickness( $\mu\text{m}$ ) |                            |
|-------|-----------------|--------------------------|-------------------------------------------|--------------------------------------------|----------------------------|
|       | before cycle    | 400 <sup>th</sup> cycles |                                           | before cycle                               | after cycle                |
| SBR-1 | 23              | 32.8                     | 42.61                                     | 98-99                                      | 149-152@400 <sup>th</sup>  |
| SBR-2 | 23              | 32                       | 39.13                                     | 98-99                                      | 158-159@450 <sup>th</sup>  |
| PAA-1 | 23.2            | 30.3                     | 30.60                                     | 98-99                                      | 147-148 @450 <sup>th</sup> |
| PAA-2 | 23              | 30.8                     | 33.91                                     | 98-99                                      | 146-149@400 <sup>th</sup>  |

## Figure Captions

1

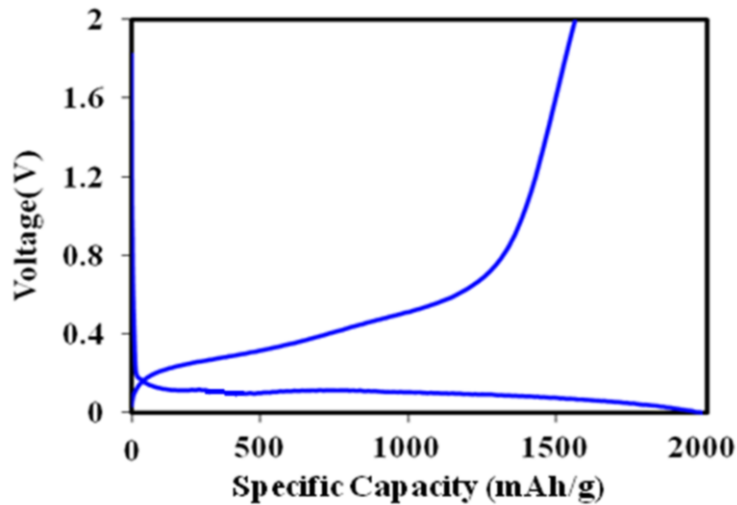

**Fig. S1** The first charge and discharge curve of the  $\text{SiO}_x$  sample.

35

40

5

10

15

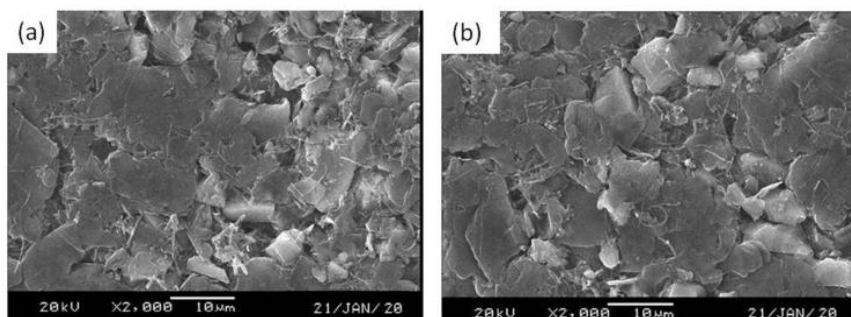

20

**Fig. S2** SEM of anode electrodes after rolling (a) SBR binder; (b) PAA binder.

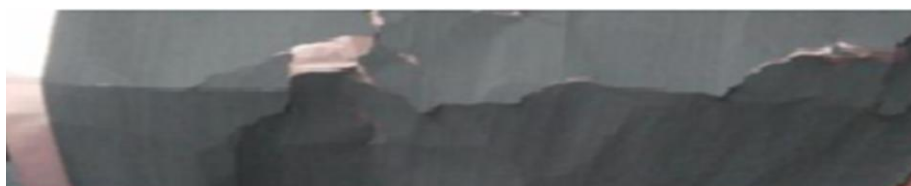

25

**Fig. S3** Fresh anode electrode using PAA as binder.
